# Supplementary material for: An Individualized Red Blood Cell Transfusion Strategy Using Pediatric Perioperative-Transfusion-Trigger Score Reduced Perioperative Blood Exposure for Children: A Randomized Controlled Clinical Trial
Source: Research Square preprint supplement (doi:10.21203/rs.3.rs-846792/v1), 2021-10-26
Supplement: Supplementary file 1 [file 55f9afb44ad424254171b42e.docx]

Supplementary 2 Appendix

Complication rating system and intraoperative/postoperative complications record

| Patient complication rating | |
| --- | --- |
| Grade 1 (I): Immediate recovery after treatment  Grade 2 (II): Leading to extended hospital stay  Grade 3(III): Life-threatening events, basic rehabilitation within 30 days after treatment  Grade 4 (IV): Caused a significant decline in life quality 30 days after surgery  Grade 5 (V): Death within 30 days after surgery | Note: The end of the operation until 24:00 on the same day is 0 days after surgery, and the next day 00:01-24:00 is the first day after surgery. And so on. |

Definition of complications: any unexpected adverse event that occurred to a clinical study participant, whether or not the event was considered related to red blood cell transfusion.

Definition of serious complications: The Grade3/Grade4/Grade5 are defined as serious complications.

| Cardiovascular System（Multiple choices） | Time of occurrence | Patient complication rating |
| --- | --- | --- |
| □ Arrhythmia | □Intraoperative  □postoperative |__||__||__| days | □Ⅰ □Ⅱ □Ⅲ □Ⅳ □Ⅴ |
| □ Hypertension | □Intraoperative  □postoperative |__||__||__| days | □Ⅰ □Ⅱ □Ⅲ □Ⅳ □Ⅴ |
| □ Hypotension | □Intraoperative  □postoperative |__||__||__| days | □Ⅰ □Ⅱ □Ⅲ □Ⅳ □Ⅴ |
| □ Acute myocardial  infarction | □Intraoperative  □postoperative |__||__||__| days | □Ⅰ □Ⅱ □Ⅲ □Ⅳ □Ⅴ |
| □ Cardiac functional  insufficiency | □Intraoperative  □postoperative |__||__||__| days | □Ⅰ □Ⅱ □Ⅲ □Ⅳ □Ⅴ |
| □ Cardiovascular infection | □Intraoperative  □postoperative |__||__||__| days | □Ⅰ □Ⅱ □Ⅲ □Ⅳ □Ⅴ |
| □ Pericardial tamponade | □Intraoperative  □postoperative |__||__||__| days | □Ⅰ □Ⅱ □Ⅲ □Ⅳ □Ⅴ |
| □ Cardiac arrest | □Intraoperative  □postoperative |__||__||__| days | □Ⅰ □Ⅱ □Ⅲ □Ⅳ □Ⅴ |
| - Other complications , please describe below： | □Intraoperative  □postoperative |__||__||__| days | □Ⅰ □Ⅱ □Ⅲ □Ⅳ □Ⅴ |

Cardiovascular complications：

Neurological complications：

| Nervous system | Time of occurrence | Patient complication rating |
| --- | --- | --- |
| - Disorder of   consciousness | □Intraoperative  □postoperative |__||__||__| days | □Ⅰ □Ⅱ □Ⅲ □Ⅳ □Ⅴ |
| □ Disabling dyskinesia | □Intraoperative  □postoperative |__||__||__| days | □Ⅰ □Ⅱ □Ⅲ □Ⅳ □Ⅴ |
| □Intracranial hemorrhage / hematoma | □Intraoperative  □postoperative |__||__||__| days | □Ⅰ □Ⅱ □Ⅲ □Ⅳ □Ⅴ |
| □Central nervous system infection | □Intraoperative  □postoperative |__||__||__| days | □Ⅰ □Ⅱ □Ⅲ □Ⅳ □Ⅴ |
| □ Cerebral edema | □Intraoperative  □postoperative |__||__||__| days | □Ⅰ □Ⅱ □Ⅲ □Ⅳ □Ⅴ |
| □ Cerebral infarction | □Intraoperative  □postoperative |__||__||__| days | □Ⅰ □Ⅱ □Ⅲ □Ⅳ □Ⅴ |
| □ Transient ischemic attack | □Intraoperative  □postoperative |__||__||__| days | □Ⅰ □Ⅱ □Ⅲ □Ⅳ □Ⅴ |
| □Peripheral nervous system dysfunction | □Intraoperative  □postoperative |__||__||__| days | □Ⅰ □Ⅱ □Ⅲ □Ⅳ □Ⅴ |
| - Other complications , please describe below： | □Intraoperative  □postoperative |__||__||__| days | □Ⅰ □Ⅱ □Ⅲ □Ⅳ □Ⅴ |

Respiratory complications：

| Respiratory System（Multiple choices） | Time of occurrence | Patient complication rating |
| --- | --- | --- |
| □ Atelectasis | □Intraoperative  □postoperative |__||__||__| days | □Ⅰ □Ⅱ □Ⅲ □Ⅳ □Ⅴ |
| □ Respiratory insufficiency | □Intraoperative  □postoperative |__||__||__| days | □Ⅰ □Ⅱ □Ⅲ □Ⅳ □Ⅴ |
| □ Pulmonary infection | □Intraoperative  □postoperative |__||__||__| days | □Ⅰ □Ⅱ □Ⅲ □Ⅳ □Ⅴ |
| □ Asthma | □Intraoperative  □postoperative |__||__||__| days | □Ⅰ □Ⅱ □Ⅲ □Ⅳ □Ⅴ |
| □ Bronchopleural fistula | □Intraoperative  □postoperative |__||__||__| days | □Ⅰ □Ⅱ □Ⅲ □Ⅳ □Ⅴ |
| □ Pneumothorax | □Intraoperative  □postoperative |__||__||__| days | □Ⅰ □Ⅱ □Ⅲ □Ⅳ □Ⅴ |
| □ Hemothorax | □Intraoperative  □postoperative |__||__||__| days | □Ⅰ □Ⅱ □Ⅲ □Ⅳ □Ⅴ |
| □ Hemopneumothorax | □Intraoperative  □postoperative |__||__||__| days | □Ⅰ □Ⅱ □Ⅲ □Ⅳ □Ⅴ |
| □ Pyothorax | □Intraoperative  □postoperative |__||__||__| days | □Ⅰ □Ⅱ □Ⅲ □Ⅳ □Ⅴ |
| □ Respiratory failure | □Intraoperative  □postoperative |__||__||__| days | □Ⅰ □Ⅱ □Ⅲ □Ⅳ □Ⅴ |
| □ Pulmonary embolism | □Intraoperative  □postoperative |__||__||__| days | □Ⅰ □Ⅱ □Ⅲ □Ⅳ □Ⅴ |
| □ Acute respiratory distress syndrome | □Intraoperative  □postoperative |__||__||__| days | □Ⅰ □Ⅱ □Ⅲ □Ⅳ □Ⅴ |
| - Other complications , please describe below： | □Intraoperative  □postoperative |__||__||__| days | □Ⅰ □Ⅱ □Ⅲ □Ⅳ □Ⅴ |

Digestive system Complications：

| Digestive System（Multiple choices） | Time of occurrence | Patient complication rating |
| --- | --- | --- |
| □ Nausea and vomiting | □Intraoperative  □postoperative |__||__||__| days | □Ⅰ □Ⅱ □Ⅲ □Ⅳ □Ⅴ |
| □ Diarrhea | □Intraoperative  □postoperative |__||__||__| days | □Ⅰ □Ⅱ □Ⅲ □Ⅳ □Ⅴ |
| □ Anastomotic fistula | □Intraoperative  □postoperative |__||__||__| days | □Ⅰ □Ⅱ □Ⅲ □Ⅳ □Ⅴ |
| □ Abdominal abscess | □Intraoperative  □postoperative |__||__||__| days | □Ⅰ □Ⅱ □Ⅲ □Ⅳ □Ⅴ |
| □ Abdominal infection | □Intraoperative  □postoperative |__||__||__| days | □Ⅰ □Ⅱ □Ⅲ □Ⅳ □Ⅴ |
| □ Hemorrhage of digestive tract | □Intraoperative  □postoperative |__||__||__| days | □Ⅰ □Ⅱ □Ⅲ □Ⅳ □Ⅴ |
| □ Intestinal obstruction | □Intraoperative  □postoperative |__||__||__| days | □Ⅰ □Ⅱ □Ⅲ □Ⅳ □Ⅴ |
| □ Digestive tract perforation | □Intraoperative  □postoperative |__||__||__| days | □Ⅰ □Ⅱ □Ⅲ □Ⅳ □Ⅴ |
| □ Intestinal necrosis | □Intraoperative  □postoperative |__||__||__| days | □Ⅰ □Ⅱ □Ⅲ □Ⅳ □Ⅴ |
| □ Hepatic insufficiency | □Intraoperative  □postoperative |__||__||__| days | □Ⅰ □Ⅱ □Ⅲ □Ⅳ □Ⅴ |
| □ Peritonitis | □Intraoperative  □postoperative |__||__||__| days | □Ⅰ □Ⅱ □Ⅲ □Ⅳ □Ⅴ |
| - Other complications （describe below）： | □Intraoperative  □postoperative |__||__||__| days | □Ⅰ □Ⅱ □Ⅲ □Ⅳ □Ⅴ |

Renal / reproductive system complications：

| Renal / reproductive System（Multiple choices） | Time of occurrence | Patient complication rating |
| --- | --- | --- |
| □ Polyuria | □Intraoperative  □postoperative |__||__||__| days | □Ⅰ □Ⅱ □Ⅲ □Ⅳ □Ⅴ |
| □ Oliguria | □Intraoperative  □postoperative |__||__||__| days | □Ⅰ □Ⅱ □Ⅲ □Ⅳ □Ⅴ |
| □ Urinary tract infection | □Intraoperative  □postoperative |__||__||__| days | □Ⅰ □Ⅱ □Ⅲ □Ⅳ □Ⅴ |
| □Reproductive system infection | □Intraoperative  □postoperative |__||__||__| days | □Ⅰ □Ⅱ □Ⅲ □Ⅳ □Ⅴ |
| □ Urinary retention | □Intraoperative  □postoperative |__||__||__| days | □Ⅰ □Ⅱ □Ⅲ □Ⅳ □Ⅴ |
| □Urinary system obstruction | □Intraoperative  □postoperative |__||__||__| days | □Ⅰ □Ⅱ □Ⅲ □Ⅳ □Ⅴ |
| □Urinary system perforation | □Intraoperative  □postoperative |__||__||__| days | □Ⅰ □Ⅱ □Ⅲ □Ⅳ □Ⅴ |
| □ Renal insufficiency | □Intraoperative  □postoperative |__||__||__| days | □Ⅰ □Ⅱ □Ⅲ □Ⅳ □Ⅴ |
| - Other complications , please describe below： | □Intraoperative  □postoperative |__||__||__| days | □Ⅰ □Ⅱ □Ⅲ □Ⅳ □Ⅴ |

**H**ematological complications：

| Hematological system（Multiple choices） | Time of occurrence | Patient complication rating |
| --- | --- | --- |
| □ DIC （Disseminated intravascular coagulation） | □Intraoperative  □postoperative |__||__||__| days | □Ⅰ □Ⅱ □Ⅲ □Ⅳ □Ⅴ |
| □ Active hemorrhage | □Intraoperative  □postoperative |__||__||__| days | □Ⅰ □Ⅱ □Ⅲ □Ⅳ □Ⅴ |
| □ Deep venous thrombosis | □Intraoperative  □postoperative |__||__||__| days | □Ⅰ □Ⅱ □Ⅲ □Ⅳ □Ⅴ |
| - Other complications ( describe below)： | □Intraoperative  □postoperative |__||__||__| days | □Ⅰ □Ⅱ □Ⅲ □Ⅳ □Ⅴ |

Endocrine system complications

| Endocrine system（Multiple choices） | Time of occurrence | Patient complication rating |
| --- | --- | --- |
| □ Hyperthyreosis | □Intraoperative  □postoperative |__||__||__| days | □Ⅰ □Ⅱ □Ⅲ □Ⅳ □Ⅴ |
| □ Hypothyroidism | □Intraoperative  □postoperative |__||__||__| days | □Ⅰ □Ⅱ □Ⅲ □Ⅳ □Ⅴ |
| □ Hyperglycemia | □Intraoperative  □postoperative |__||__||__| days | □Ⅰ □Ⅱ □Ⅲ □Ⅳ □Ⅴ |
| □ Electrolyte disturbance | □Intraoperative  □postoperative |__||__||__| days | □Ⅰ □Ⅱ □Ⅲ □Ⅳ □Ⅴ |
| - Other complications ( describe below)： | □Intraoperative  □postoperative |__||__||__| days | □Ⅰ □Ⅱ □Ⅲ □Ⅳ □Ⅴ |

| Motor System（Multiple choices） | Time of occurrence | Patient complication rating |
| --- | --- | --- |
| □ Fall | □Intraoperative  □postoperative |__||__||__| days | □Ⅰ □Ⅱ □Ⅲ □Ⅳ □Ⅴ |
| □Impairment of muscle strength | □Intraoperative  □postoperative |__||__||__| days | □Ⅰ □Ⅱ □Ⅲ □Ⅳ □Ⅴ |
| - Other complications (describe below)： | □Intraoperative  □postoperative |__||__||__| days | □Ⅰ □Ⅱ □Ⅲ □Ⅳ □Ⅴ |

Motor system complications：

**S**ensory system complications：

| Sensory System（Multiple choices） | Time of occurrence | Patient complication rating |
| --- | --- | --- |
| □ Hearing impairment | □Intraoperative  □postoperative |__||__||__| days | □Ⅰ □Ⅱ □Ⅲ □Ⅳ □Ⅴ |
| □ Visual impairment | □Intraoperative  □postoperative |__||__||__| days | □Ⅰ □Ⅱ □Ⅲ □Ⅳ □Ⅴ |
| - Other complications , please describe below： | □Intraoperative  □postoperative |__||__||__| days | □Ⅰ □Ⅱ □Ⅲ □Ⅳ □Ⅴ |

Other complications：

| Other complications（Multiple choices） | Time of occurrence | Patient complication rating |
| --- | --- | --- |
| □ Wound infection | □Intraoperative  □postoperative |__||__||__| days | □Ⅰ □Ⅱ □Ⅲ □Ⅳ □Ⅴ |
| □Systemic inflammatory response syndrome / sepsis | □Intraoperative  □postoperative |__||__||__| days | □Ⅰ □Ⅱ □Ⅲ □Ⅳ □Ⅴ |
| □ Shock | □Intraoperative  □postoperative |__||__||__| days | □Ⅰ □Ⅱ □Ⅲ □Ⅳ □Ⅴ |
| □ MODS | □Intraoperative  □postoperative |__||__||__| days | □Ⅰ □Ⅱ □Ⅲ □Ⅳ □Ⅴ |
| - Other complications , please describe below： | □Intraoperative  □postoperative |__||__||__| days | □Ⅰ □Ⅱ □Ⅲ □Ⅳ □Ⅴ |
| Note: (1) Complication occurs multiple times：Rating the most serious outcome as the final rating;  (2) Grade I-III : Rating complications before discharge  (3) Grade IV : Rating complications during follow-up period  (4) Grade V: Rating complications before discharge or during the follow-up period according to the time of occurrence | | |
